# Supplementary material for: Efficient CRISPR-Cas9-Mediated Knock-In of Composite Tags in Zebrafish Using Long ssDNA as a Donor
Source: PubMed Central journal article supplement (PMC7928300; doi:10.3389/fcell.2020.598634), 2021-02-11
Supplement: Data_Sheet_1.pdf [file Data_Sheet_1.pdf]

*Supplementary Material*

**Efficient CRISPR-Cas9-Mediated Knock-In of Composite Tags in Zebrafish Using Long ssDNA as a Donor**

**Deshani C. Ranawakage<sup>†</sup>, Keita Okada, Kota Sugio, Yuya Kawaguchi, Yuki Kuninobu-Bonkohara, Takuya Takada, and Yusuke Kamachi\***

School of Environmental Science and Engineering, Kochi University of Technology, Kami, Kochi 782-8502, Japan

**\* Correspondence:**

Yusuke Kamachi

[kamachi.yusuke@kochi-tech.ac.jp](mailto:kamachi.yusuke@kochi-tech.ac.jp)

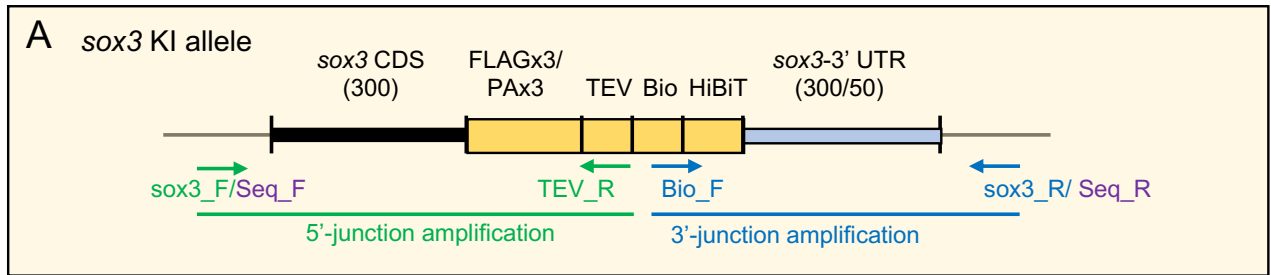

**B**

**a** Founder ID

FLAGx3-300\_#9

FLAGx3-50\_#9,  
16,19, 20, 21, 22

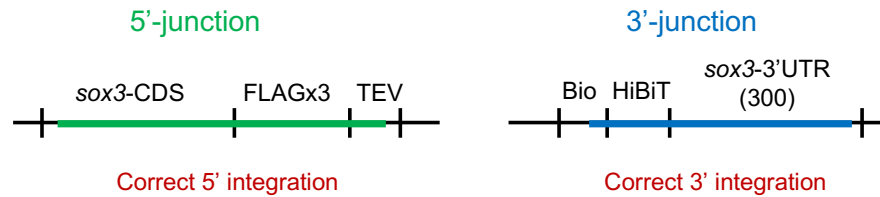

FLAGx3-300\_#1

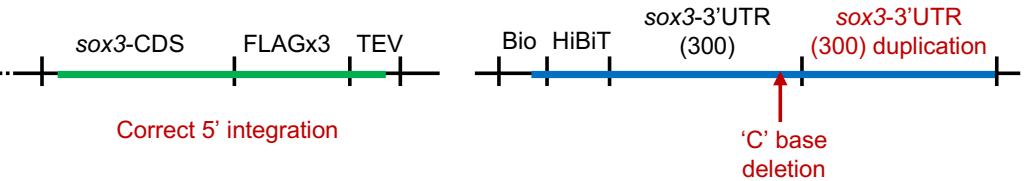

FLAGx3-300\_#6

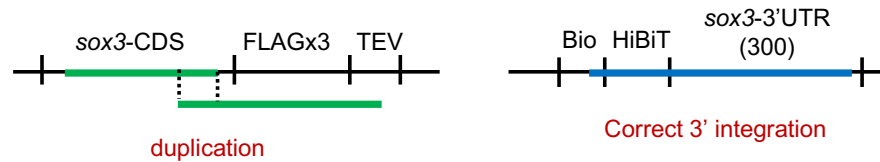

FLAGx3-300\_#30

No 5' amplification

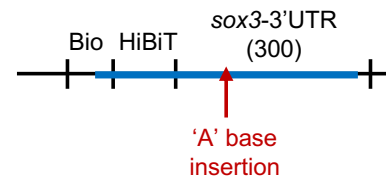

FLAGx3-50\_#23

(F0 x WT)

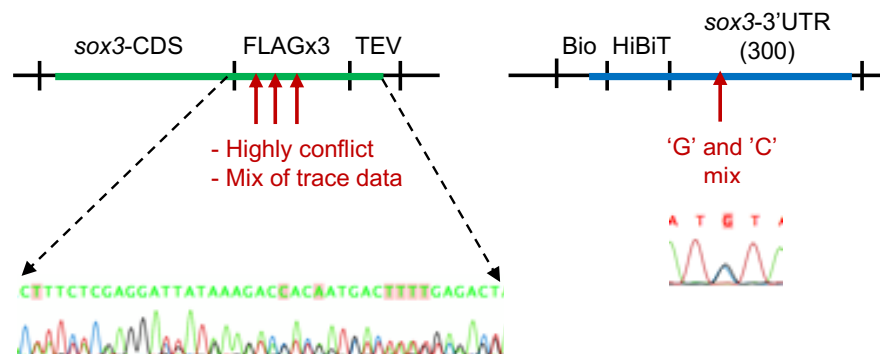

Germline mosaicism

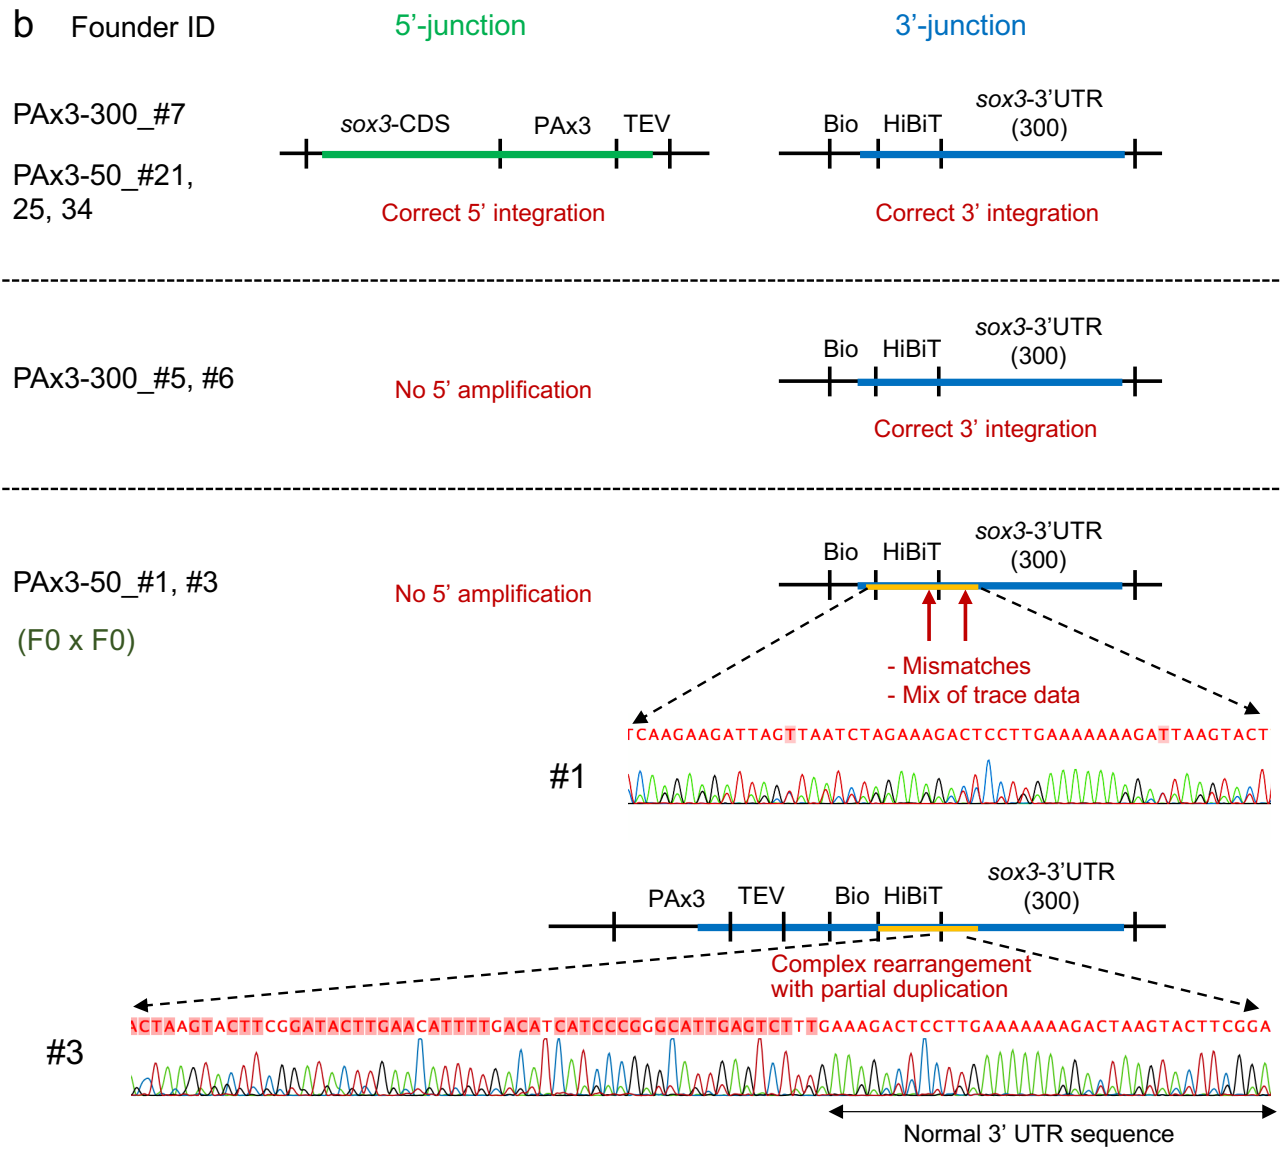

**Supplementary Figure 1. Sequencing analysis of the knock-in events in F0 fish.** (A) Schematic representation of PCR amplification of the 5' and 3' junctions of the *sox3* knock-in alleles. Positions of PCR and sequencing primers are illustrated in the upper box and the sequence of each primer is listed in Table S1. Genomic DNA was prepared from in-crossed or out-crossed F1 embryos and Sanger sequencing was performed using the junction PCR products. (B) The 5' and 3' junctions of the analyzed FLAGx3 (a) and PAX3 (b) composite tag alleles are indicated in green and blue, respectively, along with the Sanger sequencing chromatograms.

## A Sox3-FLAGx3\_#16 F2 embryos

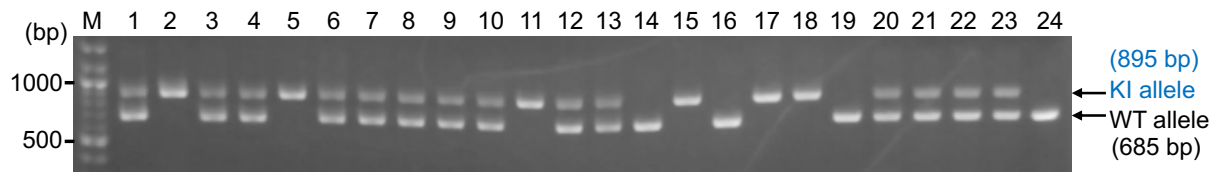

## B Sox3- PAX3\_#16 F2 embryos

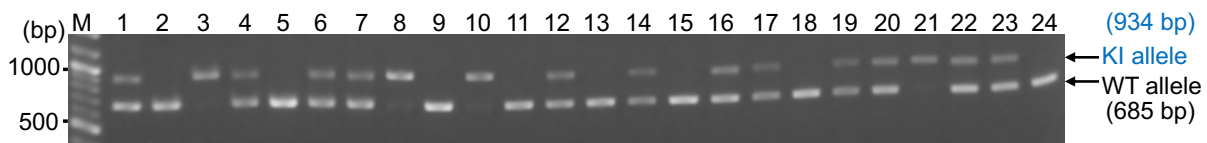

## C Genotypic ratios of the F2 embryos

|             | KI / KI    | KI / WT     | WT / WT    |
|-------------|------------|-------------|------------|
| Sox3-FLAGx3 | 25% (6/24) | 58% (14/24) | 17% (4/24) |
| Sox3-PAX3   | 17% (4/24) | 50% (12/24) | 33% (8/24) |

**Supplementary Figure 2. Transmission of the knock-in alleles from F1 to F2 generation.** The heterozygous F1 knock-in fish derived from the FLAGx3-50\_#16 and PAX3-50\_#21 founders were crossed to obtain their F2 embryos. (A) The agarose gel electrophoresis image represents amplicons of PCR that was performed using genomic DNA from individual FLAGx3-50\_#16 F2 embryos and the primers shown in Figure 6. (B) The agarose gel electrophoresis image represents amplicons of PCR that was performed using genomic DNA from individual PAX3-50\_#21 F2 embryos. (C) Genotypic ratios of the F2 embryos.

KpnI  
 GGTACCCACCATGGCGCATCATCACCACCATCATGGAGGGGGACTCAATGACATTTTTGAAGCTCAAAGATCGAGTGGCACGAG  
 M A H H H H H H G G G L N D I F E A Q K I E W H E  
 HIS6 Bio-tag  
  
 GGCCTCATCACCACCATCACCACGAGAACCTGTACTTCCAGGGTCTAGCGATTATAAAGACGACGATGACAAAGGAGACTAC  
 G A H H H H H E N L Y F Q G A S D Y K D D D D K G D Y  
 HIS6 TEV FLAGx3  
  
 AAGGACGATGACGACAAAATTGATTACAAGGACGATGATGATAAGGGATCC  
 K D D D D K I D Y K D D D D K G S  
BamHI

**Supplementary Figure 3. Nucleotide and amino acid sequences of the HBH-FLAGx3 composite tag.** The amino acid sequence of the HBH-FLAGx3 composite tag for N-terminal tagging is shown with its corresponding nucleotide sequences. The Kozak consensus and start codon sequences are preceded by the KpnI site and the FLAGx3 sequence is followed by the BamHI site to enable cloning into the pUC19 vector. TEV: TEV protease cleavage site; Bio tag: biotin ligase recognition site.

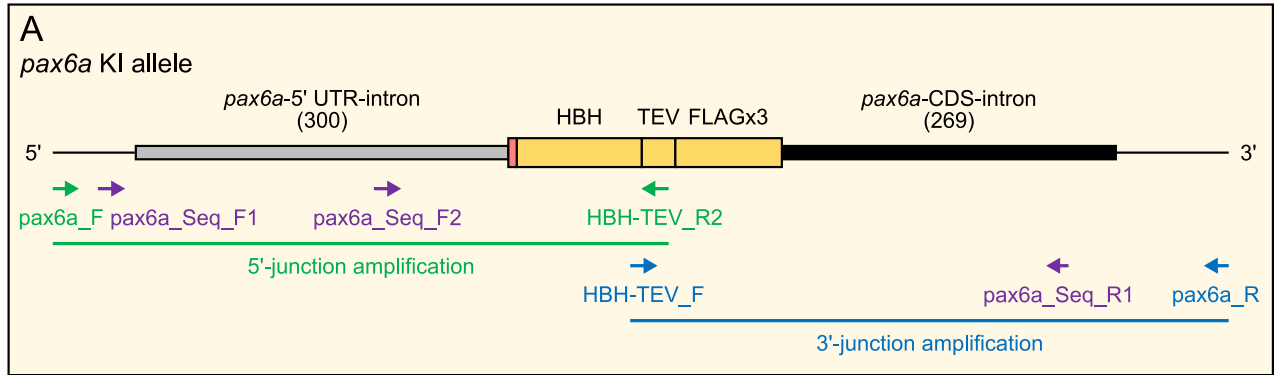

**B**

Founder ID

5'-junction

3'-junction

T\_269/300\_#6  
T\_269/50\_#5  
NT\_300/50\_#2-3

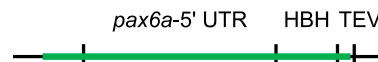

Correct 5' integration

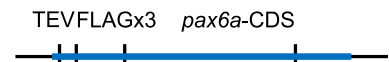

Correct 3' integration

T\_269/300\_#3

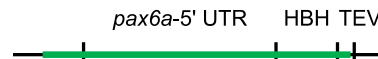

Correct 5' integration

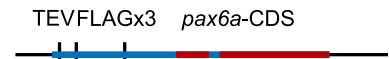

↑ HBH *pax6a*-CDS  
insertion duplication

T\_269/50\_#3

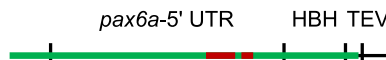

↑ *pax6a*-5' UTR *pax6a*-CDS-linker  
duplication insertion

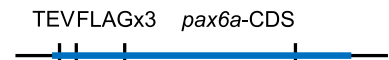

Correct 3' integration

T\_269/50\_#9

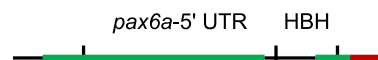

↓ *pax6a*-5' UTR HBH-TEV  
deletion duplication

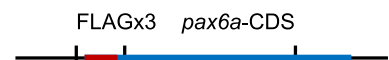

↑ *pax6a*-CDS-linker  
insertion

T\_269/50\_#16

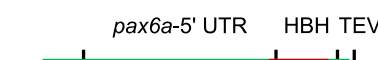

↑ Unknown sequence  
insertion

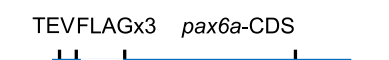

↓ FLAGx3  
deletion

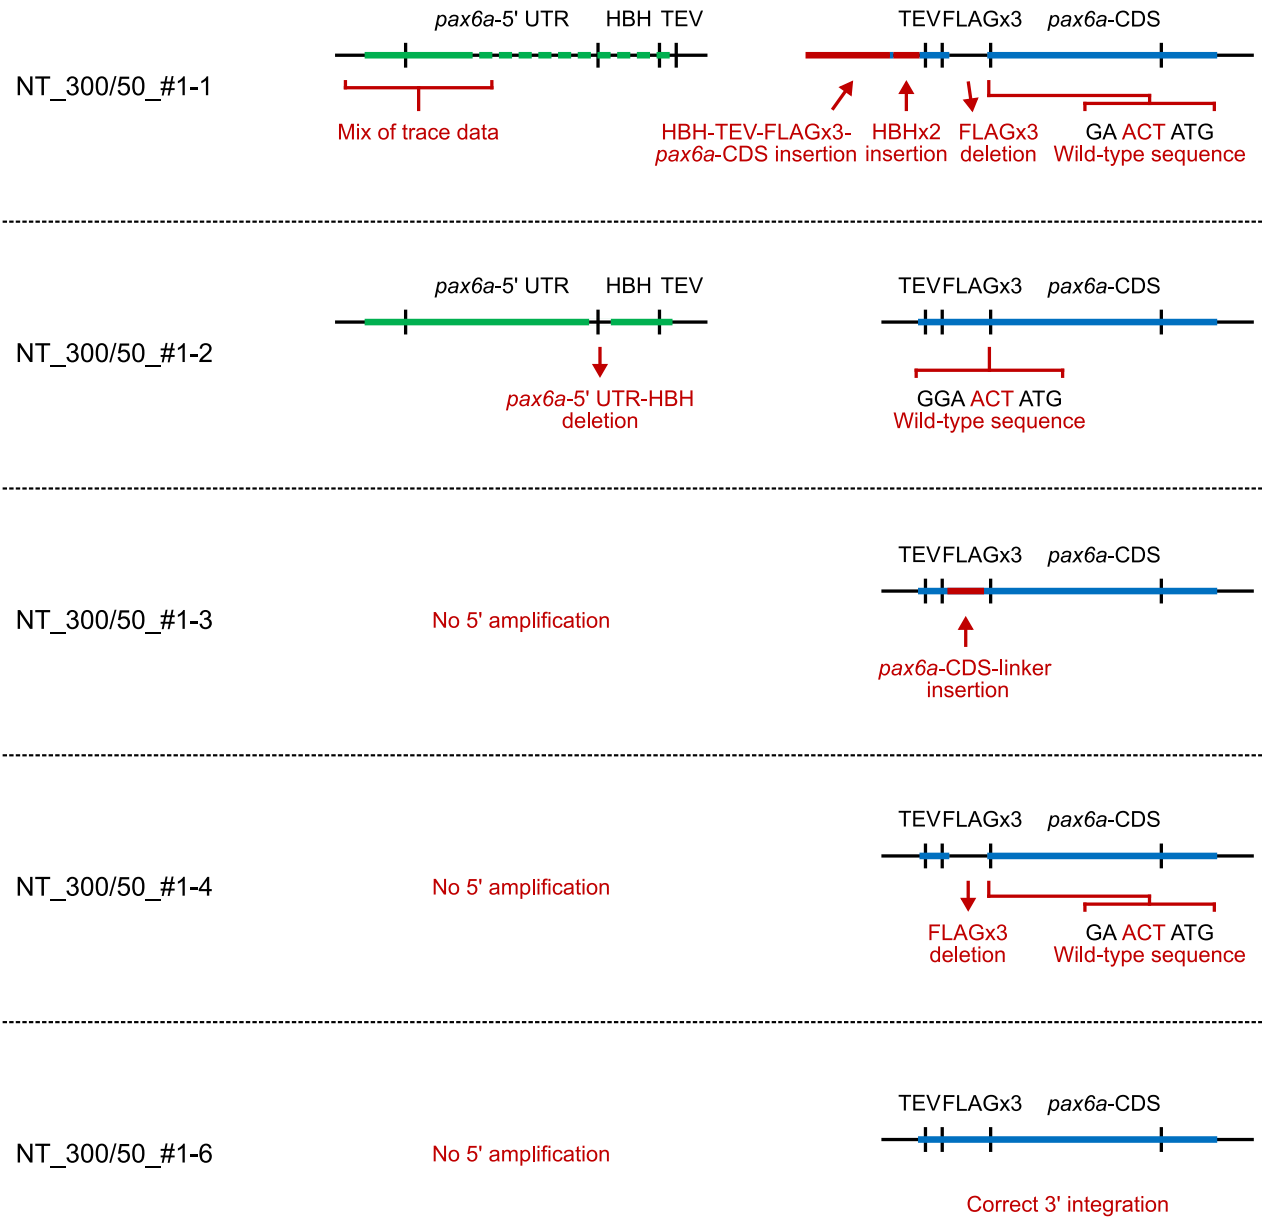

**Supplementary Figure 4. Sequencing analysis of the knock-in events in F0 fish of the *pax6a* knock-in.** (A) Schematic representation of PCR amplification of the 5' and 3' junctions of the *pax6a* knock-in alleles. Positions of PCR and sequencing primers are illustrated in the upper box and the sequence of each primer is listed in Table S1. Genomic DNA was prepared from in-crossed or out-crossed F1 embryos and Sanger sequencing was performed using the junction PCR products. (B) The 5' and 3' junctions of the analyzed composite tag alleles are indicated in green and blue, respectively.

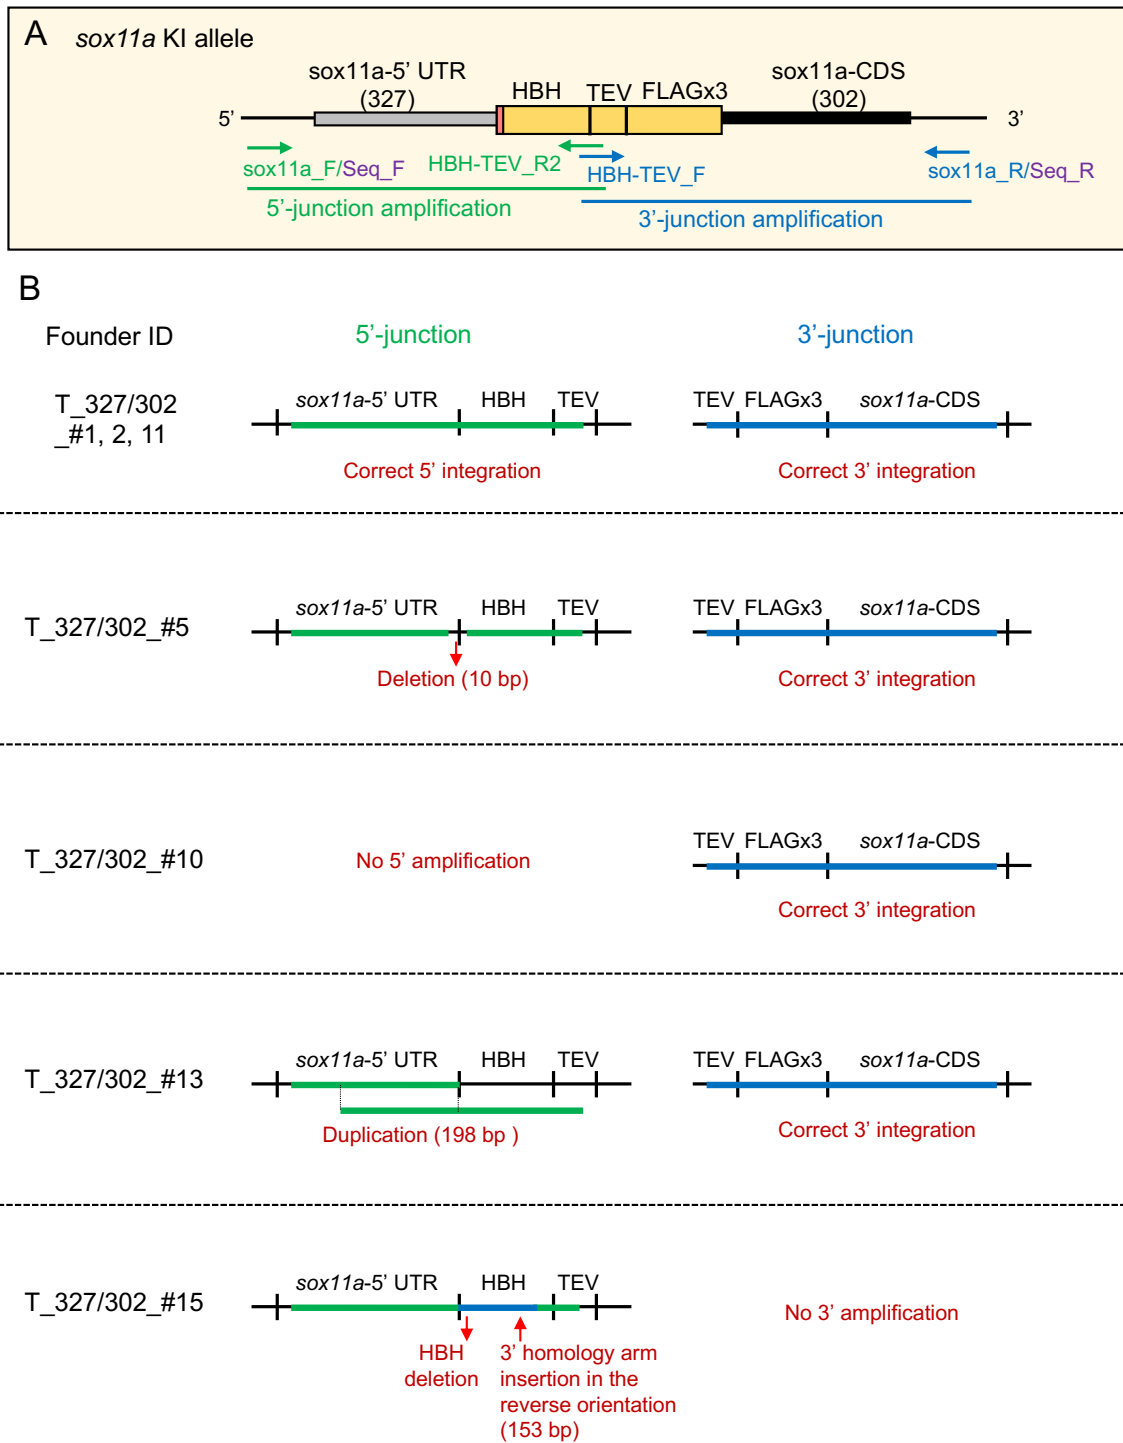

**Supplementary Figure 5. Sequencing analysis of the knock-in events in F0 fish of the *sox11a* knock-in.** (A) Schematic representation of PCR amplification of the 5' and 3' junctions of the *sox11a* knock-in alleles. Positions of PCR and sequencing primers are illustrated in the upper box and the sequence of each primer is listed in Table S1. Genomic DNA was prepared from in-crossed or out-crossed F1 embryos and Sanger sequencing was performed using the junction PCR products. (B) The 5' and 3' junctions of the analyzed composite tag alleles are indicated in green and blue, respectively.



**Supplementary Table 1. PCR and sequencing primers.**

| PCR/sequencing                               | Primer name                     | Sequence                              |
|----------------------------------------------|---------------------------------|---------------------------------------|
| HMA PCR                                      | sox3_HMA_F                      | ACTCCAGTCTACAGACCAGTC                 |
|                                              | sox3_HMA_R                      | TTCAAGTATCCGAAGTACTTAGTC              |
| Knock-in allele specific PCRs and sequencing | sox3_F/Seq_F                    | GCGGGACTTCAGTACCCAATGA                |
|                                              | TEV_R                           | TGGAAGTACAGTTCTCACGCG                 |
|                                              | Bio-tag_F                       | AAAGATCGAGTGGCACGAGG                  |
|                                              | sox3_R/Seq_R                    | TGAACGTA CTCTCCCTCCGT                 |
|                                              | sox11a_F/Seq_F                  | TCTCTCCTTTAGTCTAACGGATCCTG            |
|                                              | sox11a_R/Seq_R                  | TGTATTTGTAGTCGGGGTAGTCAGC             |
|                                              | pax6a_F                         | AGCTAATGGGCCACTGAAGAG                 |
|                                              | pax6a_R                         | CGGTCTTGGCCTACTGTGAC                  |
|                                              | HBH-TEV_R2                      | ACCCTGGAAGTACAGGTTCTCG                |
|                                              | HBH-TEV_F                       | CACCATCACCACGAGAACCTGT                |
|                                              | pax6a_Seq_F1                    | GGCACAGACCAGGAACACATAC                |
|                                              | pax6a_Seq_F2                    | CCACCCGAGATCAGTTGGAAC                 |
|                                              | pax6a_Seq_R1                    | CACCACGAGGTTGTGCAG                    |
| ICE PCRs                                     | sox3_F/Seq_F                    | GCGGGACTTCAGTACCCAATGA                |
|                                              | sox3_R/Seq_R                    | TGAACGTA CTCTCCCTCCGT                 |
|                                              | sox11a_F                        | AGTCTCTCGGCTTCCCTGATG                 |
|                                              | sox11a_R                        | GAGCGCGTAAAGGGTTAAAGC                 |
|                                              | pax6a_F2                        | CAGAGGTCAGGCTCAGCTAATGG               |
|                                              | pax6a_R2                        | AGGCAAAGAGGCTCCGTGAAAA                |
| ICE Sanger sequencing                        | sox3_F/Seq_F                    | GCGGGACTTCAGTACCCAATGA                |
|                                              | sox11a_F(ICE)                   | CATTTTCCAGCGCTTCCCAAG                 |
|                                              | pax6a_R3                        | CACCACGAGGTTGTGCAG                    |
| PCRs for sox3 donor homology arms            | sox3_5_CDS_EcoRI_F              | CACGAATTGCGTCCAGTACAGCAGCATGTC        |
|                                              | sox3_5_CDS_XhoI_R               | GTCCTCGAGAATGTGTGTTAGGGGTAGCGTTCCGTTT |
|                                              | sox3_3_UTR_XbaI_F               | CACTCTAGAAAGACTCCTTGAAAAAAGA          |
|                                              | sox3_3_UTR_PstI_R               | GTCCTGCAGGAAATAGAGCCTTTCACGAAGC       |
|                                              | sox3_3_UTR_50_PstI_R            | GACCTGCAGTCAAAATGTTCAAGTATCCG         |
| PCRs for sox11a donor homology arms          | sox11a(-323)_PstI_F             | GGGCTGCAGCAACATTATAGCGCGCGGTTTG       |
|                                              | sox11a-5_UTR_KpnI_R             | GGGGGTACCGGTGCCGTTGCCGTGCGTTG         |
|                                              | sox11a-GG-CDS_BamHI_F           | GGGGGATCCGGCGGAATGGTGCAGCAAACGGACAAC  |
|                                              | sox11a(+302)_XhoI_R             | GGGCTCGAGTGTTCACCGGAGTCTCTCGGC        |
|                                              | sox11a(-50)_PstI_F              | GGGCTGCAGACGTACACACGGGTTGATAT         |
|                                              | sox11a(+50)_XhoI_R              | GGGCTCGAGGCTTCTCTAGACATGCTGTC         |
| PCRs for pax6a donor homology arms           | pax6a_300bp_PstI_F              | GGGCTGCAGAGTGCTATACCAATCAGCAT         |
|                                              | pax6a_5_UTR-crAA_KpnI_R         | GGGGGTACCGCCTTTGTATCCTCGCTGAAG        |
|                                              | pax6a_start-intron_BamHI_F      | GGGGGATCCATGCCTCAAAAAGGTAAGTTAAGAC    |
|                                              | pax6a_EcoRI_R                   | GGGGAATTCAGGCAAAGAGGCTCCGTGAAAA       |
|                                              | pax6a_UTR_50bp_PstI_F           | GGGCTGCAGAGAGTCTTCTCGTTATTGTAAACG     |
|                                              | pax6a_start-intron_50bp-EcoRI_R | GGGGAATTCGGCATATTGCTAAAAAGAGAAG       |

**Supplementary Table 2. Primers and probes for qPCR.**

| qPCR target         |             | Primer/probe name | Sequence                         | Annealing and extension temperature |
|---------------------|-------------|-------------------|----------------------------------|-------------------------------------|
| sox3-PAx3-Bio-HiBiT | 5' junction | sox3_F2           | GTCCACGGCTCAGACCTACAT            | 62°C                                |
|                     |             | TEV_R2            | CACCTGGAAGTACAGGTTCTCA           |                                     |
|                     |             | sox3_5'_probe     | CTCGAGAATGTGTGTTAGGGGTAGCGTTCC   |                                     |
| sox3-PAx3-Bio-HiBiT | 3' junction | TEV_F             | AACCTGTACTTCCAGGGTGGAG           | 62°C                                |
|                     |             | sox3_R(qPCR)      | CGTACTCTCCCTCCGTTTCTCTTT         |                                     |
|                     |             | sox3_3'_probe     | TCTAGATTAGCTAATCTTCTTGAACAGCCGCC |                                     |
| sox11a-HBH-FLAGx3   | 5' junction | sox11a_F          | TCTCTCCTTtagTCTAACGGATCCTG       | 64°C                                |
|                     |             | HBH-TEV_R3        | AAGTACAGGTTCTCGTGGTATGG          |                                     |
|                     |             | sox11a_5'_probe   | TACCCACCATGGCGCATCATCACCA        |                                     |
| sox11a-HBH-FLAGx3   | 3' junction | HBH-TEV_F2        | CCATCACCACGAGAACCTGACTT          | 64°C                                |
|                     |             | sox11a_R          | TGTATTTGTAGTCGGGGTAGTCAGC        |                                     |
|                     |             | sox11a_3'_probe   | TGATAAGGGATCCGGCGGAATGGTGC       |                                     |
| pax6a-HBH-FLAGx3    | 5' junction | pax6a_F           | AGCTAATGGGCCACTGAAGAG            | 62°C                                |
|                     |             | HBH-TEV_R2        | ACCCTGGAAGTACAGGTTCTCG           |                                     |
|                     |             | pax6a_5'_probe    | AGGATACAAAGGCGGTACCCACCATGG      |                                     |
| pax6a-HBH-FLAGx3    | 3' junction | HBH-TEV_F         | CACCATCACCACGAGAACCTGT           | 62°C                                |
|                     |             | pax6a_R           | CGGTCTTGGCCTACTGTGAC             |                                     |
|                     |             | pax6a_3'_probe    | AGGACGATGATGATAAGGGATCCATGCCTCA  |                                     |
| hesx1               |             | hesx1_F           | CCAAGCAGCCAACAGAGATCAA           | 60°C                                |
|                     |             | hesx1_R           | ATGCTCGGCTTCACAAAAGCAC           |                                     |
|                     |             | hesx1_probe       | TGCTTCCAGCAAATTGCCAAGCGGC        |                                     |
